# Supplementary material for: 2-Propionylthiophene: planar, or not planar, that is the question
Source: Royal Society of Chemistry journal article supplement (doi:10.1039/d0cp02749a), 2020-01-01
Supplement: d0cp02749a1.pdf [file d0cp02749a1.pdf]

**Table S1:** Coefficients of the one-dimensional Fourier expansion for the potential energy curves calculated using different methods in combination with the basis set 6-311++G(d,p) given in Figure 2. The potential is expanded as  $V(\varphi) = \sum_{i=0}^6 a_i f_i$ .

| <i>i</i> | <i>f<sub>i</sub></i> | MP2                            |                                         | B3LYP-D3BJ                     |                                         | M06-2X                         |                                         |
|----------|----------------------|--------------------------------|-----------------------------------------|--------------------------------|-----------------------------------------|--------------------------------|-----------------------------------------|
|          |                      | <i>a<sub>i</sub></i> / Hartree | <i>a<sub>i</sub></i> / cm <sup>-1</sup> | <i>a<sub>i</sub></i> / Hartree | <i>a<sub>i</sub></i> / cm <sup>-1</sup> | <i>a<sub>i</sub></i> / Hartree | <i>a<sub>i</sub></i> / cm <sup>-1</sup> |
| 0        | 1                    | -743.5311916                   |                                         | -745.1229207                   |                                         | -744.9051433                   |                                         |
| 1        | cos α                | 0.0028798                      | 632.1                                   | 0.0029098                      | 638.6                                   | 0.0031160                      | 683.9                                   |
| 2        | cos 2α               | 0.0019198                      | 421.3                                   | 0.0014663                      | 321.8                                   | 0.0013606                      | 298.6                                   |
| 3        | cos 3α               | 0.0013365                      | 293.3                                   | 0.0009516                      | 208.8                                   | 0.0012842                      | 281.9                                   |
| 4        | cos 4α               | -0.0000195                     | -4.3                                    | -0.0002997                     | -65.8                                   | -0.0003624                     | -79.5                                   |
| 5        | cos 5α               | -0.0001154                     | -25.3                                   | -0.0002322                     | -51.0                                   | -0.0002568                     | -56.4                                   |
| 6        | cos 6α               | -0.0000843                     | -18.5                                   | -0.0001263                     | -27.7                                   | -0.0001612                     | -35.4                                   |

**Table S2a:** Nuclear coordinates in the principal axis system of *syn*-2PT and *syn*-C<sub>1</sub>-2PT calculated at the MP2/6-311++G(d,p) level of theory (for atom numbering see Figure 1).

|            | <i>syn</i>   |              |              | <i>syn</i> -C <sub>1</sub> |              |              |
|------------|--------------|--------------|--------------|----------------------------|--------------|--------------|
|            | <i>a</i> / Å | <i>b</i> / Å | <i>c</i> / Å | <i>a</i> / Å               | <i>b</i> / Å | <i>c</i> / Å |
| <b>S1</b>  | 1.456117     | -1.068910    | -0.001120    | -1.425833                  | -0.996238    | 0.254844     |
| <b>C2</b>  | 0.238294     | 0.148986     | -0.026017    | -0.117773                  | 0.040897     | -0.169793    |
| <b>C3</b>  | 0.799023     | 1.424550     | -0.018429    | -0.558553                  | 1.346264     | -0.383623    |
| <b>C4</b>  | 2.212207     | 1.395798     | -0.001248    | -1.949355                  | 1.490184     | -0.179608    |
| <b>C5</b>  | 2.702798     | 0.099129     | 0.010986     | -2.547706                  | 0.289409     | 0.170759     |
| <b>C6</b>  | -1.185448    | -0.244282    | 0.007579     | 1.240941                   | -0.522254    | -0.308733    |
| <b>O7</b>  | -1.511642    | -1.426265    | 0.005583     | 1.433700                   | -1.731191    | -0.218555    |
| <b>C8</b>  | -2.210229    | 0.878001     | 0.051818     | 2.385416                   | 0.456373     | -0.480162    |
| <b>C9</b>  | -3.643985    | 0.365936     | -0.032649    | 2.767487                   | 1.065373     | 0.878463     |
| <b>H10</b> | 3.738959     | -0.215527    | 0.018085     | -3.592871                  | 0.111123     | 0.391075     |
| <b>H11</b> | 2.847947     | 2.274112     | 0.001793     | -2.496545                  | 2.419991     | -0.287911    |
| <b>H12</b> | 0.207180     | 2.333266     | -0.025575    | 0.102771                   | 2.158244     | -0.665391    |
| <b>H13</b> | -2.046611    | 1.439292     | 0.980700     | 3.226298                   | -0.105303    | -0.895256    |
| <b>H14</b> | -1.990902    | 1.571496     | -0.768932    | 2.110935                   | 1.245735     | -1.187078    |
| <b>H15</b> | -3.859336    | -0.318246    | 0.790567     | 3.040577                   | 0.273916     | 1.582180     |
| <b>H16</b> | -4.347855    | 1.201449     | 0.010884     | 3.622152                   | 1.738740     | 0.770310     |
| <b>H17</b> | -3.805358    | -0.178476    | -0.965846    | 1.933921                   | 1.630514     | 1.304393     |

**Table S2b:** Nuclear coordinates in the principal axis system of *anti*-2PT and *anti*-C<sub>1</sub>-2PT calculated at the MP2/6-311++G(d,p) level of theory (for atom numbering see Figure 1).

|            | <i>anti</i>  |              |              | <i>anti</i> -C <sub>1</sub> |              |              |
|------------|--------------|--------------|--------------|-----------------------------|--------------|--------------|
|            | <i>a</i> / Å | <i>b</i> / Å | <i>c</i> / Å | <i>a</i> / Å                | <i>b</i> / Å | <i>c</i> / Å |
| <b>S1</b>  | 1.099446     | -1.204830    | 0.078603     | 0.950111                    | -1.140002    | -0.345710    |
| <b>C2</b>  | 0.288352     | 0.316970     | 0.037589     | 0.184278                    | 0.387191     | -0.108543    |
| <b>C3</b>  | 1.199980     | 1.363632     | -0.062459    | 1.103078                    | 1.343126     | 0.314990     |
| <b>C4</b>  | 2.539798     | 0.918524     | -0.087529    | 2.411701                    | 0.826757     | 0.431822     |
| <b>C5</b>  | 2.636546     | -0.463186    | -0.020129    | 2.477640                    | -0.519817    | 0.105100     |
| <b>C6</b>  | -1.188412    | 0.459930     | 0.014194     | -1.269272                   | 0.614848     | -0.297548    |
| <b>O7</b>  | -1.701405    | 1.566525     | 0.118265     | -1.722777                   | 1.753125     | -0.277448    |
| <b>C8</b>  | -2.014906    | -0.800719    | -0.177295    | -2.170530                   | -0.597062    | -0.419678    |
| <b>C9</b>  | -3.510253    | -0.560055    | -0.003688    | -2.534641                   | -1.118626    | 0.979733     |
| <b>H10</b> | 3.532510     | -1.070837    | -0.007143    | 3.348220                    | -1.163379    | 0.095270     |
| <b>H11</b> | 3.405298     | 1.568197     | -0.155130    | 3.276633                    | 1.400721     | 0.745249     |
| <b>H12</b> | 0.875141     | 2.396935     | -0.112830    | 0.804975                    | 2.365382     | 0.519900     |
| <b>H13</b> | -1.793798    | -1.186669    | -1.181312    | -3.071398                   | -0.281771    | -0.952686    |
| <b>H14</b> | -1.654866    | -1.562684    | 0.525883     | -1.681298                   | -1.386698    | -1.000875    |
| <b>H15</b> | -3.863945    | 0.191879     | -0.711809    | -3.035041                   | -0.334200    | 1.554160     |
| <b>H16</b> | -4.065697    | -1.487335    | -0.167249    | -3.208707                   | -1.976139    | 0.905548     |
| <b>H17</b> | -3.728552    | -0.195626    | 1.002962     | -1.641039                   | -1.431822    | 1.527205     |

**Table S3a:** Rotational constants and dihedral angles of *syn*-2PT calculated at various levels of theory. The deviations between the calculated and the experimental values are given as  $\Delta A$ ,  $\Delta B$  and  $\Delta C$ .

| Method/Basis Set      | <i>A</i> / | $\Delta A$ / | <i>B</i> / | $\Delta B$ / | <i>C</i> / | $\Delta C$ / | $\alpha$ / | $\beta$ / |
|-----------------------|------------|--------------|------------|--------------|------------|--------------|------------|-----------|
|                       | MHz        | MHz          | MHz        | MHz          | MHz        | MHz          | °          | °         |
| MP2/6-31G(d,p)        | 3410.4     | -17.0        | 879.3      | 2.1          | 705.1      | 0.2          | 0.0        | 180.0     |
| MP2/6-31+G(d,p)       | 3393.4     | -34.0        | 877.5      | 0.3          | 703.6      | -1.3         | -3.2       | 174.2     |
| MP2/6-31++G(d,p)      | 3391.1     | -36.3        | 877.8      | 0.6          | 703.8      | -1.1         | -3.7       | 172.5     |
| MP2/6-311G(d,p)       | 3404.6     | -22.8        | 877.6      | 0.4          | 703.8      | -1.1         | 0.0        | 180.0     |
| MP2/6-311+G(d,p)      | 3396.0     | -31.4        | 876.8      | -0.4         | 703.1      | -1.8         | -2.4       | 175.9     |
| MP2/6-311++G(d,p)     | 3394.9     | -32.5        | 877.0      | -0.2         | 703.1      | -1.8         | -2.6       | 175.2     |
| MP2/6-311G(df,pd)     | 3429.5     | 2.1          | 883.0      | 5.8          | 708.3      | 3.4          | 0.0        | 180.0     |
| MP2/6-311+G(df,pd)    | 3418.4     | -9.0         | 882.1      | 4.9          | 707.5      | 2.6          | -3.5       | 174.5     |
| MP2/6-311++G(df,pd)   | 3418.3     | -9.1         | 882.2      | 5.0          | 707.6      | 2.7          | -3.5       | 174.1     |
| MP2/6-311G(3df,3pd)   | 3442.3     | 14.9         | 885.9      | 8.7          | 710.7      | 5.8          | 0.0        | 180.0     |
| MP2/6-311+G(3df,3pd)  | 3432.6     | 5.2          | 885.4      | 8.2          | 709.9      | 5.0          | 0.0        | 180.0     |
| MP2/6-311++G(3df,3pd) | 3432.7     | 5.3          | 885.4      | 8.2          | 709.9      | 5.0          | 0.0        | -180.0    |
| MP2/cc-pVDZ           | 3370.3     | -57.1        | 870.7      | -6.5         | 698.0      | -6.9         | 0.0        | 180.0     |
| MP2/cc-pVTZ           | 3423.4     | -4.0         | 883.9      | 6.7          | 708.6      | 3.7          | 0.0        | 180.0     |
| MP2/aug-cc-pVDZ       | 3351.6     | -75.8        | 869.8      | -7.4         | 696.6      | -8.3         | 0.0        | 180.0     |
| MP2/aug-cc-pVTZ       | 3419.5     | -7.9         | 883.9      | 6.7          | 708.4      | 3.5          | 0.0        | 180.0     |

|                              |               |             |              |            |              |             |            |               |
|------------------------------|---------------|-------------|--------------|------------|--------------|-------------|------------|---------------|
| B3LYP-D3/6-31G(d,p)          | 3395.6        | -31.8       | 870.4        | -6.8       | 698.7        | -6.2        | 0.0        | -180.0        |
| B3LYP-D3/6-31+G(d,p)         | 3385.0        | -42.4       | 868.2        | -9.0       | 696.9        | -8.0        | 0.0        | -180.0        |
| B3LYP-D3/6-31++G(d,p)        | 3385.0        | -42.4       | 868.2        | -9.0       | 696.9        | -8.0        | 0.0        | -180.0        |
| B3LYP-D3/6-311G(d,p)         | 3406.5        | -20.9       | 871.5        | -5.7       | 699.9        | -5.0        | 0.0        | 180.0         |
| B3LYP-D3/6-311+G(d,p)        | 3400.3        | -27.1       | 870.5        | -6.7       | 699.0        | -5.9        | 0.0        | 180.0         |
| B3LYP-D3/6-311++G(d,p)       | 3400.1        | -27.3       | 870.5        | -6.7       | 699.0        | -5.9        | 0.0        | -180.0        |
| B3LYP-D3/6-311G(df,pd)       | 3416.5        | -10.9       | 873.8        | -3.4       | 701.8        | -3.1        | 0.0        | 180.0         |
| B3LYP-D3/6-311+G(df,pd)      | 3410.6        | -16.8       | 872.8        | -4.4       | 700.9        | -4.0        | 0.0        | 180.0         |
| B3LYP-D3/6-311++G(df,pd)     | 3410.6        | -16.8       | 872.8        | -4.4       | 700.9        | -4.0        | 0.0        | 180.0         |
| B3LYP-D3/6-311G(3df,3pd)     | 3437.9        | 10.5        | 876.3        | -0.9       | 704.3        | -0.6        | 0.0        | -180.0        |
| B3LYP-D3/6-311+G(3df,3pd)    | 3429.9        | 2.5         | 875.8        | -1.4       | 703.6        | -1.3        | 0.0        | -180.0        |
| B3LYP-D3/6-311++G(3df,3pd)   | 3429.7        | 2.3         | 875.8        | -1.4       | 703.6        | -1.3        | 0.0        | 180.0         |
| B3LYP-D3/cc-pVDZ             | 3385.4        | -42.0       | 868.5        | -8.7       | 697.2        | -7.7        | 0.0        | 180.0         |
| B3LYP-D3/cc-pVTZ             | 3423.8        | -3.6        | 874.6        | -2.6       | 702.6        | -2.3        | 0.0        | 180.0         |
| B3LYP-D3/aug-cc-pVDZ         | 3377.9        | -49.5       | 867.3        | -9.9       | 696.0        | -8.9        | 0.0        | -180.0        |
| B3LYP-D3/aug-cc-pVTZ         | 3421.1        | -6.3        | 874.5        | -2.7       | 702.4        | -2.5        | 0.0        | 180.0         |
| B3LYP-D3BJ/6-31G(d,p)        | 3400.4        | -27.0       | 872.9        | -4.3       | 700.6        | -4.3        | 0.0        | 180.0         |
| B3LYP-D3BJ/6-31+G(d,p)       | 3389.2        | -38.2       | 870.7        | -6.5       | 698.7        | -6.2        | 0.0        | -180.0        |
| B3LYP-D3BJ/6-31++G(d,p)      | 3389.2        | -38.2       | 870.7        | -6.5       | 698.7        | -6.2        | 0.0        | 180.0         |
| B3LYP-D3BJ/6-311G(d,p)       | 3410.7        | -16.7       | 874.0        | -3.2       | 701.7        | -3.2        | 0.0        | 180.0         |
| B3LYP-D3BJ/6-311+G(d,p)      | 3404.1        | -23.3       | 873.1        | -4.1       | 700.8        | -4.1        | 0.0        | -180.0        |
| B3LYP-D3BJ/6-311++G(d,p)     | 3404.0        | -23.4       | 873.1        | -4.1       | 700.8        | -4.1        | 0.0        | -180.0        |
| B3LYP-D3BJ/6-311G(df,pd)     | 3420.5        | -6.9        | 876.3        | -0.9       | 703.6        | -1.3        | 0.0        | -180.0        |
| B3LYP-D3BJ/6-311+G(df,pd)    | 3414.1        | -13.3       | 875.4        | -1.8       | 702.7        | -2.2        | 0.0        | -180.0        |
| B3LYP-D3BJ/6-311++G(df,pd)   | 3414.0        | -13.4       | 875.4        | -1.8       | 702.7        | -2.2        | 0.0        | -180.0        |
| B3LYP-D3BJ/6-311G(3df,3pd)   | 3441.7        | 14.3        | 878.8        | 1.6        | 706.0        | 1.1         | 0.0        | -180.0        |
| B3LYP-D3BJ/6-311+G(3df,3pd)  | 3433.2        | 5.8         | 878.3        | 1.1        | 705.4        | 0.5         | 0.0        | -180.0        |
| B3LYP-D3BJ/6-311++G(3df,3pd) | 3433.1        | 5.7         | 878.4        | 1.2        | 705.4        | 0.5         | 0.0        | -180.0        |
| B3LYP-D3BJ/cc-pVDZ           | 3390.4        | -37.0       | 871.0        | -6.2       | 699.0        | -5.9        | 0.0        | 180.0         |
| <b>B3LYP-D3BJ/cc-pVTZ</b>    | <b>3427.5</b> | <b>0.1</b>  | <b>877.2</b> | <b>0.0</b> | <b>704.4</b> | <b>-0.5</b> | <b>0.0</b> | <b>-180.0</b> |
| B3LYP-D3BJ/aug-cc-pVDZ       | 3382.3        | -45.1       | 869.8        | -7.4       | 697.9        | -7.0        | 0.0        | -180.0        |
| B3LYP-D3BJ/aug-cc-pVTZ       | 3424.7        | -2.7        | 877.1        | -0.1       | 704.2        | -0.7        | 0.0        | -180.0        |
| M06-2X/6-31G(d,p)            | 3436.0        | 8.6         | 878.6        | 1.4        | 705.7        | 0.8         | 0.0        | -180.0        |
| M06-2X/6-31+G(d,p)           | 3427.5        | 0.1         | 876.7        | -0.5       | 704.2        | -0.7        | 0.0        | 180.0         |
| M06-2X/6-31++G(d,p)          | 3427.5        | 0.1         | 876.7        | -0.5       | 704.2        | -0.7        | 0.0        | 180.0         |
| M06-2X/6-311G(d,p)           | 3441.7        | 14.3        | 879.5        | 2.3        | 706.5        | 1.6         | 0.0        | 180.0         |
| M06-2X/6-311+G(d,p)          | 3437.2        | 9.8         | 878.6        | 1.4        | 705.8        | 0.9         | 0.0        | 180.0         |
| M06-2X/6-311++G(d,p)         | 3437.1        | 9.7         | 878.6        | 1.4        | 705.8        | 0.9         | 0.0        | 180.0         |
| M06-2X/6-311G(df,pd)         | 3449.4        | 22.0        | 881.2        | 4.0        | 708.0        | 3.1         | 0.0        | 180.0         |
| M06-2X/6-311+G(df,pd)        | 3445.3        | 17.9        | 880.3        | 3.1        | 707.2        | 2.3         | 0.0        | 180.0         |
| M06-2X/6-311++G(df,pd)       | 3445.2        | 17.8        | 880.3        | 3.1        | 707.2        | 2.3         | 0.0        | 180.0         |
| M06-2X/6-311G(3df,3pd)       | 3469.5        | 42.1        | 883.3        | 6.1        | 710.1        | 5.2         | 0.0        | 180.0         |
| M06-2X/6-311+G(3df,3pd)      | 3463.1        | 35.7        | 882.9        | 5.7        | 709.7        | 4.8         | 0.0        | 180.0         |
| M06-2X/6-311++G(3df,3pd)     | 3463.0        | 35.6        | 882.9        | 5.7        | 709.6        | 4.7         | 0.0        | 180.0         |
| <b>M06-2X/cc-pVDZ</b>        | <b>3427.0</b> | <b>-0.4</b> | <b>877.4</b> | <b>0.2</b> | <b>704.6</b> | <b>-0.3</b> | <b>0.0</b> | <b>180.0</b>  |
| M06-2X/cc-pVTZ               | 3456.1        | 28.7        | 882.6        | 5.4        | 709.1        | 4.2         | 0.0        | 180.0         |
| M06-2X/aug-cc-pVDZ           | 3420.5        | -6.9        | 876.1        | -1.1       | 703.6        | -1.3        | 0.0        | -180.0        |

|                    |               |       |              |       |              |       |     |       |
|--------------------|---------------|-------|--------------|-------|--------------|-------|-----|-------|
| M06-2X/aug-cc-pVTZ | 3454.9        | 27.5  | 882.5        | 5.3   | 709.0        | 4.1   | 0.0 | 180.0 |
| CCSD/cc-pVDZ       | 3372.0        | -55.4 | 863.9        | -13.3 | 693.7        | -11.2 | 0.0 | 180.0 |
| <b>Experiment</b>  | <b>3427.4</b> |       | <b>877.2</b> |       | <b>704.9</b> |       |     |       |

**Table S3b:** Rotational constants and dihedral angles of *anti*-2PT calculated at various levels of theory. The deviations between the calculated and the experimental values are given as  $\Delta A$ ,  $\Delta B$  and  $\Delta C$ .

| Method/Basis Set           | <i>A</i> /<br>MHz | $\Delta A$ /<br>MHz | <i>B</i> /<br>MHz | $\Delta B$ /<br>MHz | <i>C</i> /<br>MHz | $\Delta C$ /<br>MHz | $\alpha$ /<br>° | $\beta$ /<br>° |
|----------------------------|-------------------|---------------------|-------------------|---------------------|-------------------|---------------------|-----------------|----------------|
| MP2/6-31G(d,p)             | 3268.9            | -5.1                | 903.6             | -2.1                | 714.1             | -2.1                | -180.0          | 180.0          |
| MP2/6-31+G(d,p)            | 3242.8            | -31.2               | 904.3             | -1.5                | 715.3             | -1.0                | 172.8           | 171.7          |
| MP2/6-31++G(d,p)           | 3241.1            | -32.9               | 904.5             | -1.2                | 715.5             | -0.8                | 172.8           | 171.4          |
| MP2/6-311G(d,p)            | 3267.4            | -6.6                | 902.9             | -2.8                | 713.7             | -2.6                | -180.0          | -180.0         |
| MP2/6-311+G(d,p)           | 3247.0            | -27.0               | 904.6             | -1.1                | 715.7             | -0.5                | 173.3           | 172.7          |
| MP2/6-311++G(d,p)          | 3245.4            | -28.6               | 904.8             | -1.0                | 716.0             | -0.2                | 172.8           | 172.5          |
| MP2/6-311G(df,pd)          | 3290.8            | 16.8                | 909.1             | 3.4                 | 718.7             | 2.4                 | 178.8           | 178.1          |
| MP2/6-311+G(df,pd)         | 3266.8            | -7.2                | 910.7             | 5.0                 | 720.9             | 4.7                 | 172.5           | 172.1          |
| MP2/6-311++G(df,pd)        | 3265.7            | -8.3                | 910.8             | 5.0                 | 721.1             | 4.9                 | 172.1           | 172.0          |
| MP2/6-311G(3df,3pd)        | 3302.2            | 28.2                | 913.2             | 7.5                 | 721.7             | 5.4                 | -180.0          | 180.0          |
| MP2/6-311+G(3df,3pd)       | 3293.8            | 19.8                | 913.7             | 7.9                 | 721.6             | 5.3                 | -180.0          | 180.0          |
| MP2/6-311++G(3df,3pd)      | 3293.9            | 19.9                | 913.7             | 7.9                 | 721.6             | 5.3                 | -180.0          | 180.0          |
| MP2/cc-pVDZ                | 3231.7            | -42.3               | 895.7             | -10.1               | 707.5             | -8.7                | -180.0          | 180.0          |
| MP2/cc-pVTZ                | 3284.1            | 10.1                | 911.2             | 5.4                 | 719.5             | 3.3                 | -180.0          | 180.0          |
| MP2/aug-cc-pVDZ            | 3215.3            | -58.7               | 897.6             | -8.2                | 707.9             | -8.3                | -180.0          | 180.0          |
| B3LYP-D3/6-31G(d,p)        | 3249.9            | -24.1               | 894.7             | -11.1               | 707.6             | -8.6                | -180.0          | -180.0         |
| B3LYP-D3/6-31+G(d,p)       | 3240.8            | -33.2               | 893.9             | -11.9               | 706.7             | -9.5                | -180.0          | 180.0          |
| B3LYP-D3/6-31++G(d,p)      | 3240.7            | -33.3               | 893.9             | -11.8               | 706.7             | -9.5                | -180.0          | -180.0         |
| B3LYP-D3/6-311G(d,p)       | 3260.1            | -13.9               | 895.9             | -9.8                | 708.9             | -7.3                | -180.0          | -180.0         |
| B3LYP-D3/6-311+G(d,p)      | 3253.6            | -20.4               | 896.4             | -9.4                | 708.9             | -7.4                | -180.0          | 180.0          |
| B3LYP-D3/6-311++G(d,p)     | 3253.4            | -20.6               | 896.4             | -9.3                | 708.9             | -7.3                | -180.0          | 180.0          |
| B3LYP-D3/6-311G(df,pd)     | 3269.7            | -4.3                | 898.7             | -7.1                | 711.1             | -5.2                | -180.0          | -180.0         |
| B3LYP-D3/6-311+G(df,pd)    | 3263.5            | -10.5               | 899.1             | -6.6                | 711.0             | -5.2                | -180.0          | 180.0          |
| B3LYP-D3/6-311++G(df,pd)   | 3263.3            | -10.7               | 899.1             | -6.6                | 711.0             | -5.2                | -180.0          | 180.0          |
| B3LYP-D3/6-311G(3df,3pd)   | 3291.7            | 17.7                | 901.6             | -4.1                | 713.9             | -2.3                | -179.9          | 180.0          |
| B3LYP-D3/6-311+G(3df,3pd)  | 3284.1            | 10.1                | 902.3             | -3.5                | 714.0             | -2.3                | -180.0          | 180.0          |
| B3LYP-D3/6-311++G(3df,3pd) | 3284.0            | 10.0                | 902.3             | -3.5                | 714.0             | -2.3                | -180.0          | 180.0          |
| B3LYP-D3/cc-pVDZ           | 3239.1            | -34.9               | 892.9             | -12.8               | 706.1             | -10.1               | 180.0           | -180.0         |
| B3LYP-D3/cc-pVTZ           | 3276.8            | 2.8                 | 900.6             | -5.1                | 712.6             | -3.7                | -180.0          | 180.0          |
| B3LYP-D3/aug-cc-pVDZ       | 3233.5            | -40.5               | 893.6             | -12.1               | 706.3             | -10.0               | -180.0          | 180.0          |
| B3LYP-D3/aug-cc-pVTZ       | 3274.2            | 0.2                 | 901.0             | -4.7                | 712.7             | -3.5                | -180.0          | 180.0          |
| B3LYP-D3BJ/6-31G(d,p)      | 3247.0            | -27.0               | 899.1             | -6.7                | 710.2             | -6.0                | 180.0           | -180.0         |
| B3LYP-D3BJ/6-31+G(d,p)     | 3237.7            | -36.3               | 898.4             | -7.4                | 709.4             | -6.9                | -180.0          | -180.0         |
| B3LYP-D3BJ/6-31++G(d,p)    | 3237.7            | -36.3               | 898.4             | -7.4                | 709.4             | -6.9                | -180.0          | 180.0          |
| B3LYP-D3BJ/6-311G(d,p)     | 3256.8            | -17.2               | 900.4             | -5.4                | 711.5             | -4.7                | 180.0           | 180.0          |
| B3LYP-D3BJ/6-311+G(d,p)    | 3250.0            | -24.0               | 901.0             | -4.8                | 711.6             | -4.7                | -180.0          | 180.0          |

|                              |               |             |              |             |              |             |               |               |
|------------------------------|---------------|-------------|--------------|-------------|--------------|-------------|---------------|---------------|
| B3LYP-D3BJ/6-311++G(d,p)     | 3249.8        | -24.2       | 901.0        | -4.7        | 711.6        | -4.6        | -180.0        | 180.0         |
| B3LYP-D3BJ/6-311G(df,pd)     | 3265.9        | -8.1        | 903.2        | -2.5        | 713.7        | -2.5        | 180.0         | 180.0         |
| B3LYP-D3BJ/6-311+G(df,pd)    | 3259.4        | -14.6       | 903.8        | -1.9        | 713.8        | -2.5        | -180.0        | 180.0         |
| B3LYP-D3BJ/6-311++G(df,pd)   | 3259.2        | -14.8       | 903.9        | -1.9        | 713.8        | -2.4        | -180.0        | 180.0         |
| B3LYP-D3BJ/6-311G(3df,3pd)   | 3287.2        | 13.2        | 906.4        | 0.6         | 716.7        | 0.4         | -180.0        | -180.0        |
| B3LYP-D3BJ/6-311+G(3df,3pd)  | 3279.4        | 5.4         | 907.1        | 1.3         | 716.7        | 0.5         | -180.0        | 180.0         |
| B3LYP-D3BJ/6-311++G(3df,3pd) | 3279.3        | 5.3         | 907.1        | 1.3         | 716.7        | 0.5         | -180.0        | 180.0         |
| B3LYP-D3BJ/cc-pVDZ           | 3236.5        | -37.5       | 897.3        | -8.4        | 708.7        | -7.5        | -180.0        | 180.0         |
| <b>B3LYP-D3BJ/cc-pVTZ</b>    | <b>3272.7</b> | <b>-1.3</b> | <b>905.3</b> | <b>-0.4</b> | <b>715.3</b> | <b>-0.9</b> | <b>-179.9</b> | <b>-180.0</b> |
| B3LYP-D3BJ/aug-cc-pVDZ       | 3230.3        | -43.7       | 898.2        | -7.5        | 709.0        | -7.3        | -180.0        | -180.0        |
| B3LYP-D3BJ/aug-cc-pVTZ       | 3269.8        | -4.2        | 905.8        | 0.1         | 715.5        | -0.7        | -180.0        | 180.0         |
| M06-2X/6-31G(d,p)            | 3286.7        | 12.7        | 904.7        | -1.0        | 715.7        | -0.6        | -180.0        | -180.0        |
| M06-2X/6-31+G(d,p)           | 3279.5        | 5.5         | 904.0        | -1.8        | 714.9        | -1.4        | -180.0        | 180.0         |
| M06-2X/6-31++G(d,p)          | 3279.3        | 5.3         | 904.0        | -1.7        | 714.9        | -1.4        | -180.0        | 180.0         |
| M06-2X/6-311G(d,p)           | 3293.4        | 19.4        | 906.0        | 0.3         | 716.8        | 0.6         | -180.0        | -180.0        |
| M06-2X/6-311+G(d,p)          | 3288.3        | 14.3        | 906.4        | 0.7         | 716.8        | 0.6         | -180.0        | 180.0         |
| M06-2X/6-311++G(d,p)         | 3288.0        | 14.0        | 906.5        | 0.8         | 716.8        | 0.6         | -180.0        | -180.0        |
| M06-2X/6-311G(df,pd)         | 3301.1        | 27.1        | 908.2        | 2.4         | 718.5        | 2.2         | -180.0        | -180.0        |
| M06-2X/6-311+G(df,pd)        | 3296.3        | 22.3        | 908.6        | 2.8         | 718.5        | 2.3         | -179.9        | 180.0         |
| M06-2X/6-311++G(df,pd)       | 3296.2        | 22.2        | 908.6        | 2.8         | 718.5        | 2.3         | -179.9        | 180.0         |
| M06-2X/6-311G(3df,3pd)       | 3321.5        | 47.5        | 911.0        | 5.2         | 721.2        | 4.9         | -180.0        | 180.0         |
| M06-2X/6-311+G(3df,3pd)      | 3315.4        | 41.4        | 911.5        | 5.7         | 721.2        | 5.0         | -180.0        | 180.0         |
| M06-2X/6-311++G(3df,3pd)     | 3315.4        | 41.4        | 911.5        | 5.7         | 721.2        | 5.0         | -180.0        | 180.0         |
| <b>M06-2X/cc-pVDZ</b>        | <b>3278.7</b> | <b>4.7</b>  | <b>903.5</b> | <b>-2.2</b> | <b>714.6</b> | <b>-1.6</b> | <b>-180.0</b> | <b>180.0</b>  |
| M06-2X/cc-pVTZ               | 3307.7        | 33.7        | 910.8        | 5.0         | 720.4        | 4.2         | -180.0        | 180.0         |
| M06-2X/aug-cc-pVDZ           | 3274.7        | 0.7         | 903.9        | -1.8        | 714.7        | -1.6        | -180.0        | 180.0         |
| M06-2X/aug-cc-pVTZ           | 3306.6        | 32.6        | 911.1        | 5.4         | 720.6        | 4.4         | -180.0        | 180.0         |
| CCSD/6-311++G(d,p)           | 3244.2        | -29.8       | 897.9        | -7.8        | 711.0        | -5.3        | 173.6         | 174.6         |
| CCSD/cc-pVDZ                 | 3223.0        | -51.0       | 889.8        | -15.9       | 703.5        | -12.8       | -180.0        | 180.0         |
| <b>Experiment</b>            | <b>3274.0</b> |             | <b>905.7</b> |             | <b>716.2</b> |             |               |               |

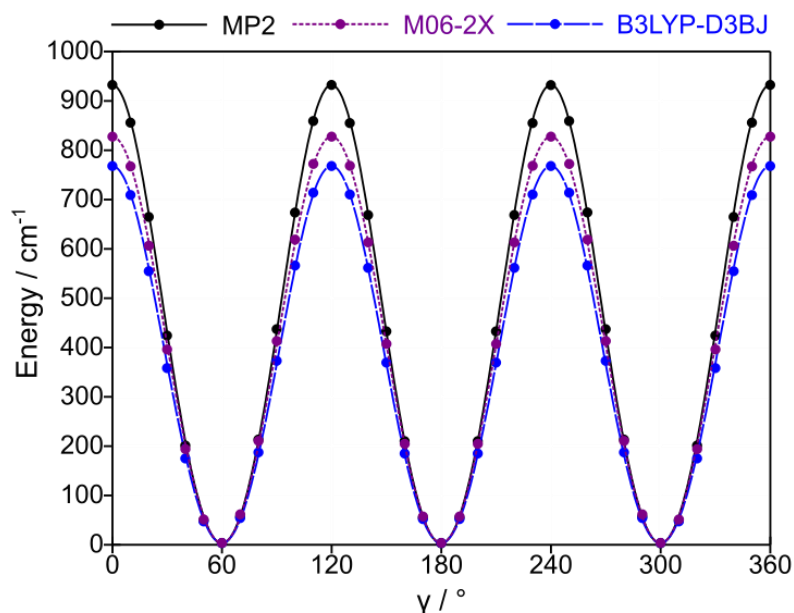

**Figure S1:** The potential energy curves of *syn*-2PT obtained by rotating the methyl group around the C8–C9 bond in 10° steps calculated at the different levels of theory with the 6-311++G(d,p) basis set. The predicted rotational barriers are 929.3 cm<sup>-1</sup> (MP2), 823.8 cm<sup>-1</sup> (M06-2X) and 764.5 cm<sup>-1</sup> (B3LYP-D3BJ). The Fourier coefficients of the parameterized potential are given in Table S4.

**Table S4:** Coefficients of the one-dimensional Fourier expansion for the potential energy curve of *syn*-2PT given in Figure S1 calculated using different methods in combination with the basis set 6-311++G(d,p). The potential is expanded as  $V(\varphi) = \sum_{i=0}^2 a_i f_i$ .

| <i>i</i> | <i>f<sub>i</sub></i> | MP2                            |                                         | B3LYP-D3BJ                     |                                         | M06-2X                         |                                         |
|----------|----------------------|--------------------------------|-----------------------------------------|--------------------------------|-----------------------------------------|--------------------------------|-----------------------------------------|
|          |                      | <i>a<sub>i</sub></i> / Hartree | <i>a<sub>i</sub></i> / cm <sup>-1</sup> | <i>a<sub>i</sub></i> / Hartree | <i>a<sub>i</sub></i> / cm <sup>-1</sup> | <i>a<sub>i</sub></i> / Hartree | <i>a<sub>i</sub></i> / cm <sup>-1</sup> |
| 0        | 1                    | -743.591750                    |                                         | -745.1212221                   |                                         | -744.9032898                   |                                         |
| 1        | cos 3α               | 0.0021111                      | 463.3                                   | 0.0017355                      | 380.9                                   | 0.0018733                      | 411.1                                   |
| 2        | cos 6α               | 0.0000805                      | 17.7                                    | 0.0000429                      | 9.4                                     | 0.0000232                      | 5.1                                     |

**Table S5:** Observed frequencies  $v_{obs}$  of 201 rotational transitions of *syn*-2PT with  $v_{obs}-v_{calc}$  values obtained from a fit with the program *XIAM*.

| No. | <i>J</i>    | <i>K<sub>a</sub></i> | <i>K<sub>c</sub></i> | <i>J</i>    | <i>K<sub>a</sub></i> | <i>K<sub>c</sub></i> | Species | <i>V<sub>obs</sub></i> | <i>V<sub>obs</sub>-V<sub>calc</sub></i> |
|-----|-------------|----------------------|----------------------|-------------|----------------------|----------------------|---------|------------------------|-----------------------------------------|
|     | upper level |                      |                      | lower level |                      |                      |         | MHz                    | kHz                                     |
| 1   | 2           | 0                    | 2                    | 1           | 0                    | 1                    | A       | 3155.7033              | -0.3                                    |
| 2   | 3           | 0                    | 3                    | 2           | 0                    | 2                    | A       | 4712.5964              | -0.2                                    |
| 3   | 4           | 0                    | 4                    | 3           | 0                    | 3                    | A       | 6245.1040              | -0.2                                    |
| 4   | 5           | 0                    | 5                    | 4           | 0                    | 4                    | A       | 7747.4055              | -0.1                                    |
| 5   | 6           | 0                    | 6                    | 5           | 0                    | 5                    | A       | 9217.1304              | -0.3                                    |
| 6   | 7           | 0                    | 7                    | 6           | 0                    | 6                    | A       | 10656.5614             | -0.7                                    |
| 7   | 8           | 0                    | 8                    | 7           | 0                    | 7                    | A       | 12072.2521             | -0.5                                    |
| 8   | 9           | 0                    | 9                    | 8           | 0                    | 8                    | A       | 13472.8402             | -0.3                                    |
| 9   | 10          | 0                    | 10                   | 9           | 0                    | 9                    | A       | 14866.3298             | 0.2                                     |
| 10  | 11          | 0                    | 11                   | 10          | 0                    | 10                   | A       | 16258.3959             | -0.1                                    |
| 11  | 12          | 0                    | 12                   | 11          | 0                    | 11                   | A       | 17652.1589             | -0.2                                    |
| 12  | 13          | 0                    | 13                   | 12          | 0                    | 12                   | A       | 19048.8281             | 0.7                                     |
| 13  | 14          | 0                    | 14                   | 13          | 0                    | 13                   | A       | 20448.5041             | -0.1                                    |
| 14  | 16          | 0                    | 16                   | 15          | 0                    | 15                   | A       | 23255.1592             | 0.6                                     |
| 15  | 4           | 0                    | 4                    | 3           | 1                    | 3                    | A       | 4088.6400              | 2.1                                     |
| 16  | 5           | 0                    | 5                    | 4           | 1                    | 4                    | A       | 5868.4507              | 1.2                                     |
| 17  | 6           | 0                    | 6                    | 5           | 1                    | 5                    | A       | 7640.2300              | 1.5                                     |
| 18  | 7           | 0                    | 7                    | 6           | 1                    | 6                    | A       | 9381.8094              | 3.4                                     |
| 19  | 8           | 0                    | 8                    | 7           | 1                    | 7                    | A       | 11078.0117             | 1.9                                     |
| 20  | 9           | 0                    | 9                    | 8           | 1                    | 8                    | A       | 12722.2717             | 0.8                                     |
| 21  | 10          | 0                    | 10                   | 9           | 1                    | 9                    | A       | 14315.5702             | 1.0                                     |
| 22  | 11          | 0                    | 11                   | 10          | 1                    | 10                   | A       | 15863.7818             | -0.5                                    |
| 23  | 12          | 0                    | 12                   | 11          | 1                    | 11                   | A       | 17374.9293             | 0.8                                     |
| 24  | 13          | 0                    | 13                   | 12          | 1                    | 12                   | A       | 18857.1752             | -0.4                                    |
| 25  | 14          | 0                    | 14                   | 13          | 1                    | 13                   | A       | 20317.7589             | 0.3                                     |
| 26  | 15          | 0                    | 15                   | 14          | 1                    | 14                   | A       | 21762.5782             | 1.3                                     |
| 27  | 2           | 1                    | 1                    | 2           | 0                    | 2                    | A       | 2903.2592              | -2.4                                    |
| 28  | 3           | 1                    | 2                    | 3           | 0                    | 3                    | A       | 3189.8822              | -2.4                                    |
| 29  | 4           | 1                    | 3                    | 4           | 0                    | 4                    | A       | 3599.9412              | -0.8                                    |
| 30  | 5           | 1                    | 4                    | 5           | 0                    | 5                    | A       | 4153.8831              | 4.6                                     |
| 31  | 7           | 1                    | 6                    | 7           | 0                    | 7                    | A       | 5764.5981              | 3.9                                     |
| 32  | 9           | 1                    | 8                    | 9           | 0                    | 9                    | A       | 8074.3749              | 3.8                                     |
| 33  | 12          | 1                    | 11                   | 12          | 0                    | 12                   | A       | 12500.6450             | 3.1                                     |
| 34  | 13          | 1                    | 12                   | 13          | 0                    | 13                   | A       | 14093.0648             | 1.2                                     |
| 35  | 14          | 1                    | 13                   | 14          | 0                    | 14                   | A       | 15689.6540             | 2.6                                     |
| 36  | 2           | 1                    | 2                    | 1           | 0                    | 1                    | A       | 5542.1227              | -3.7                                    |
| 37  | 3           | 1                    | 3                    | 2           | 0                    | 2                    | A       | 6869.0581              | -4.8                                    |
| 38  | 4           | 1                    | 4                    | 3           | 0                    | 3                    | A       | 8124.0624              | 2.1                                     |
| 39  | 4           | 1                    | 4                    | 3           | 0                    | 3                    | E       | 8124.0531              | -3.0                                    |
| 40  | 5           | 1                    | 5                    | 4           | 0                    | 4                    | A       | 9324.3027              | -5.1                                    |
| 41  | 6           | 1                    | 6                    | 5           | 0                    | 5                    | A       | 10491.8819             | -4.9                                    |
| 42  | 7           | 1                    | 7                    | 6           | 0                    | 6                    | A       | 11650.8002             | -4.7                                    |

---

|           |    |   |    |    |   |    |   |            |      |
|-----------|----|---|----|----|---|----|---|------------|------|
| <b>43</b> | 8  | 1 | 8  | 7  | 0 | 7  | A | 12822.8173 | -4.9 |
| <b>44</b> | 9  | 1 | 9  | 8  | 0 | 8  | A | 14023.6003 | -0.6 |
| <b>45</b> | 10 | 1 | 10 | 9  | 0 | 9  | A | 15260.9402 | -3.1 |
| <b>46</b> | 11 | 1 | 11 | 10 | 0 | 10 | A | 16535.6252 | -1.4 |
| <b>47</b> | 12 | 1 | 12 | 11 | 0 | 11 | A | 17843.8116 | 0.6  |
| <b>48</b> | 13 | 1 | 13 | 12 | 0 | 12 | A | 19179.5728 | -0.3 |
| <b>49</b> | 14 | 1 | 14 | 13 | 0 | 13 | A | 20536.7220 | 0.2  |
| <b>50</b> | 16 | 1 | 16 | 15 | 0 | 15 | A | 23294.2702 | -0.6 |
| <b>51</b> | 2  | 1 | 1  | 1  | 1 | 0  | A | 3336.4190  | -0.4 |
| <b>52</b> | 3  | 1 | 2  | 2  | 1 | 1  | A | 4999.2197  | 0.1  |
| <b>53</b> | 4  | 1 | 3  | 3  | 1 | 2  | A | 6655.1615  | -0.2 |
| <b>54</b> | 5  | 1 | 4  | 4  | 1 | 3  | A | 8301.3421  | 0.1  |
| <b>55</b> | 6  | 1 | 5  | 5  | 1 | 4  | A | 9934.3305  | 0.7  |
| <b>56</b> | 7  | 1 | 6  | 6  | 1 | 5  | A | 11550.0786 | -0.1 |
| <b>57</b> | 8  | 1 | 7  | 7  | 1 | 6  | A | 13143.9449 | -0.2 |
| <b>58</b> | 9  | 1 | 8  | 8  | 1 | 7  | A | 14710.9244 | -0.5 |
| <b>59</b> | 10 | 1 | 9  | 9  | 1 | 8  | A | 16246.2460 | -1.4 |
| <b>60</b> | 11 | 1 | 10 | 10 | 1 | 9  | A | 17746.4094 | -0.6 |
| <b>61</b> | 12 | 1 | 11 | 11 | 1 | 10 | A | 19210.4969 | -1.2 |
| <b>62</b> | 3  | 1 | 3  | 2  | 1 | 2  | A | 4482.6395  | -0.5 |
| <b>63</b> | 4  | 1 | 4  | 3  | 1 | 3  | A | 5967.5940  | 0.0  |
| <b>64</b> | 5  | 1 | 5  | 4  | 1 | 4  | A | 7445.3513  | -0.4 |
| <b>65</b> | 6  | 1 | 6  | 5  | 1 | 5  | A | 8914.9840  | -0.6 |
| <b>66</b> | 7  | 1 | 7  | 6  | 1 | 6  | A | 10376.0476 | -1.3 |
| <b>67</b> | 8  | 1 | 8  | 7  | 1 | 7  | A | 11828.5789 | -0.4 |
| <b>68</b> | 9  | 1 | 9  | 8  | 1 | 8  | A | 13273.0309 | -0.4 |
| <b>69</b> | 10 | 1 | 10 | 9  | 1 | 9  | A | 14710.1827 | -0.2 |
| <b>70</b> | 11 | 1 | 11 | 10 | 1 | 10 | A | 16141.0128 | -0.1 |
| <b>71</b> | 12 | 1 | 12 | 11 | 1 | 11 | A | 17566.5806 | 0.2  |
| <b>72</b> | 13 | 1 | 13 | 12 | 1 | 12 | A | 18987.9215 | 0.3  |
| <b>73</b> | 14 | 1 | 14 | 13 | 1 | 13 | A | 20405.9769 | 0.8  |
| <b>74</b> | 15 | 1 | 15 | 14 | 1 | 14 | A | 21821.5508 | 1.0  |
| <b>75</b> | 8  | 1 | 7  | 7  | 2 | 6  | A | 7510.1492  | -3.1 |
| <b>76</b> | 8  | 1 | 7  | 7  | 2 | 6  | E | 7510.1669  | 3.1  |
| <b>77</b> | 9  | 1 | 8  | 8  | 2 | 7  | A | 9666.8532  | -2.1 |
| <b>78</b> | 9  | 1 | 8  | 8  | 2 | 7  | E | 9666.8696  | 3.4  |
| <b>79</b> | 10 | 1 | 9  | 9  | 2 | 8  | A | 11824.3636 | -2.7 |
| <b>80</b> | 10 | 1 | 9  | 9  | 2 | 8  | E | 11824.3775 | 1.0  |
| <b>81</b> | 11 | 1 | 10 | 10 | 2 | 9  | A | 13958.9940 | -1.9 |
| <b>82</b> | 11 | 1 | 10 | 10 | 2 | 9  | E | 13959.0059 | 0.7  |
| <b>83</b> | 12 | 1 | 11 | 11 | 2 | 10 | A | 16046.7625 | -2.1 |
| <b>84</b> | 12 | 1 | 11 | 11 | 2 | 10 | E | 16046.7749 | 2.0  |
| <b>85</b> | 13 | 1 | 12 | 12 | 2 | 11 | A | 18066.7423 | -2.3 |
| <b>86</b> | 13 | 1 | 12 | 12 | 2 | 11 | E | 18066.7515 | -0.2 |
| <b>87</b> | 2  | 2 | 0  | 1  | 1 | 1  | A | 11167.9304 | 2.7  |
| <b>88</b> | 2  | 2 | 0  | 2  | 1 | 1  | A | 7659.2230  | -5.6 |
| <b>89</b> | 3  | 2 | 1  | 3  | 1 | 2  | A | 7439.8230  | -6.0 |

---



---

|            |    |   |    |    |   |    |   |            |      |
|------------|----|---|----|----|---|----|---|------------|------|
| <b>90</b>  | 3  | 2 | 1  | 3  | 1 | 2  | E | 7439.8154  | -2.3 |
| <b>91</b>  | 4  | 2 | 2  | 4  | 1 | 3  | E | 7189.5319  | 1.7  |
| <b>92</b>  | 5  | 2 | 3  | 5  | 1 | 4  | A | 6942.6837  | 3.2  |
| <b>93</b>  | 5  | 2 | 3  | 5  | 1 | 4  | E | 6942.6665  | -2.0 |
| <b>94</b>  | 8  | 2 | 6  | 8  | 1 | 7  | A | 6606.4561  | 1.5  |
| <b>95</b>  | 8  | 2 | 6  | 8  | 1 | 7  | E | 6606.4430  | -1.3 |
| <b>96</b>  | 2  | 2 | 1  | 2  | 1 | 2  | A | 8167.6285  | -2.2 |
| <b>97</b>  | 2  | 2 | 1  | 2  | 1 | 2  | E | 8167.6122  | 0.9  |
| <b>98</b>  | 3  | 2 | 2  | 3  | 1 | 3  | A | 8431.1924  | -5.8 |
| <b>99</b>  | 3  | 2 | 2  | 3  | 1 | 3  | E | 8431.1837  | -0.2 |
| <b>100</b> | 4  | 2 | 3  | 4  | 1 | 4  | A | 8785.3091  | -3.9 |
| <b>101</b> | 4  | 2 | 3  | 4  | 1 | 4  | E | 8785.2966  | -3.0 |
| <b>102</b> | 5  | 2 | 4  | 5  | 1 | 5  | E | 9231.5466  | 2.8  |
| <b>103</b> | 6  | 2 | 5  | 6  | 1 | 6  | A | 9771.0678  | -7.4 |
| <b>104</b> | 6  | 2 | 5  | 6  | 1 | 6  | E | 9771.0595  | -2.4 |
| <b>105</b> | 7  | 2 | 6  | 7  | 1 | 7  | A | 10404.1395 | -4.6 |
| <b>106</b> | 7  | 2 | 6  | 7  | 1 | 7  | E | 10404.1360 | 5.2  |
| <b>107</b> | 9  | 2 | 8  | 9  | 1 | 9  | A | 11945.4863 | -5.6 |
| <b>108</b> | 9  | 2 | 8  | 9  | 1 | 9  | E | 11945.4711 | -7.2 |
| <b>109</b> | 10 | 2 | 9  | 10 | 1 | 10 | A | 12847.0857 | -3.7 |
| <b>110</b> | 10 | 2 | 9  | 10 | 1 | 10 | E | 12847.0801 | 4.6  |
| <b>111</b> | 12 | 2 | 11 | 12 | 1 | 12 | A | 14883.4917 | -2.9 |
| <b>112</b> | 12 | 2 | 11 | 12 | 1 | 12 | E | 14883.4766 | -3.6 |
| <b>113</b> | 4  | 2 | 2  | 3  | 1 | 3  | A | 14878.1253 | 3.1  |
| <b>114</b> | 4  | 2 | 2  | 3  | 1 | 3  | E | 14878.1124 | 2.7  |
| <b>115</b> | 5  | 2 | 3  | 4  | 1 | 4  | E | 16964.9971 | 1.3  |
| <b>116</b> | 6  | 2 | 4  | 5  | 1 | 5  | E | 19249.1869 | 0.7  |
| <b>117</b> | 3  | 2 | 2  | 2  | 1 | 1  | A | 12397.0044 | 5.0  |
| <b>118</b> | 4  | 2 | 3  | 3  | 1 | 2  | A | 13719.4901 | 1.4  |
| <b>119</b> | 4  | 2 | 3  | 3  | 1 | 2  | E | 13719.4726 | -2.8 |
| <b>120</b> | 5  | 2 | 4  | 4  | 1 | 3  | A | 14955.9286 | 5.7  |
| <b>121</b> | 5  | 2 | 4  | 4  | 1 | 3  | E | 14955.9068 | -3.1 |
| <b>122</b> | 6  | 2 | 5  | 5  | 1 | 4  | A | 16109.0887 | 5.2  |
| <b>123</b> | 7  | 2 | 6  | 6  | 1 | 5  | A | 17183.8739 | 2.4  |
| <b>124</b> | 7  | 2 | 6  | 6  | 1 | 5  | E | 17183.8549 | -3.9 |
| <b>125</b> | 8  | 2 | 7  | 7  | 1 | 6  | A | 18188.0177 | 2.9  |
| <b>126</b> | 9  | 2 | 8  | 8  | 1 | 7  | A | 19132.8082 | 2.1  |
| <b>127</b> | 9  | 2 | 8  | 8  | 1 | 7  | E | 19132.7901 | -3.6 |
| <b>128</b> | 10 | 2 | 9  | 9  | 1 | 8  | A | 20033.6647 | 3.2  |
| <b>129</b> | 10 | 2 | 9  | 9  | 1 | 8  | E | 20033.6479 | -1.6 |
| <b>130</b> | 11 | 2 | 10 | 10 | 1 | 9  | A | 20910.1484 | 4.9  |
| <b>131</b> | 11 | 2 | 10 | 10 | 1 | 9  | E | 20910.1318 | -0.2 |
| <b>132</b> | 2  | 2 | 0  | 3  | 1 | 3  | A | 3693.4207  | -6.7 |
| <b>133</b> | 3  | 2 | 1  | 2  | 2 | 0  | A | 4779.8172  | -2.8 |
| <b>134</b> | 4  | 2 | 2  | 3  | 2 | 1  | A | 6404.8735  | -1.4 |
| <b>135</b> | 5  | 2 | 3  | 4  | 2 | 2  | A | 8054.4797  | -0.6 |
| <b>136</b> | 6  | 2 | 4  | 5  | 2 | 3  | A | 9729.5416  | -0.5 |

---

---

|     |    |   |   |   |   |   |   |            |      |
|-----|----|---|---|---|---|---|---|------------|------|
| 137 | 7  | 2 | 5 | 6 | 2 | 4 | A | 11426.2378 | -0.8 |
| 138 | 8  | 2 | 6 | 7 | 2 | 5 | A | 13136.3442 | -2.9 |
| 139 | 3  | 2 | 2 | 2 | 2 | 1 | A | 4746.2100  | 2.6  |
| 140 | 3  | 2 | 2 | 2 | 2 | 1 | E | 4746.2157  | 3.1  |
| 141 | 4  | 2 | 3 | 3 | 2 | 2 | A | 6321.7094  | 0.5  |
| 142 | 5  | 2 | 4 | 4 | 2 | 3 | A | 7891.5962  | 0.4  |
| 143 | 6  | 2 | 5 | 5 | 2 | 4 | A | 9454.5026  | 0.0  |
| 144 | 7  | 2 | 6 | 6 | 2 | 5 | A | 11009.1174 | -0.4 |
| 145 | 8  | 2 | 7 | 7 | 2 | 6 | A | 12554.2219 | -0.1 |
| 146 | 9  | 2 | 8 | 8 | 2 | 7 | A | 14088.7367 | 0.2  |
| 147 | 10 | 2 | 9 | 9 | 2 | 8 | A | 15611.7805 | 0.1  |
| 148 | 3  | 3 | 1 | 2 | 2 | 0 | A | 17924.9233 | 4.1  |
| 149 | 4  | 3 | 2 | 3 | 2 | 1 | A | 19489.4971 | 2.4  |
| 150 | 4  | 3 | 2 | 3 | 2 | 1 | E | 19489.4067 | 1.0  |
| 151 | 5  | 3 | 3 | 4 | 2 | 2 | A | 21021.3322 | 1.0  |
| 152 | 5  | 3 | 3 | 4 | 2 | 2 | E | 21021.2940 | 2.0  |
| 153 | 6  | 3 | 4 | 5 | 2 | 3 | A | 22498.7213 | 1.0  |
| 154 | 6  | 3 | 4 | 5 | 2 | 3 | E | 22498.6948 | 2.2  |
| 155 | 3  | 3 | 0 | 2 | 2 | 1 | A | 17933.6158 | 1.4  |
| 156 | 3  | 3 | 0 | 2 | 2 | 1 | E | 17933.8408 | -4.6 |
| 157 | 4  | 3 | 1 | 3 | 2 | 2 | A | 19533.3540 | 2.5  |
| 158 | 4  | 3 | 1 | 3 | 2 | 2 | E | 19533.4011 | 3.6  |
| 159 | 5  | 3 | 2 | 4 | 2 | 3 | A | 21153.7564 | -1.8 |
| 160 | 3  | 3 | 0 | 3 | 2 | 1 | E | 13145.5850 | 4.0  |
| 161 | 5  | 3 | 2 | 5 | 2 | 3 | A | 12974.0602 | -2.5 |
| 162 | 6  | 3 | 3 | 6 | 2 | 4 | A | 12790.7184 | 3.6  |
| 163 | 6  | 3 | 3 | 6 | 2 | 4 | E | 12790.6994 | 0.7  |
| 164 | 8  | 3 | 5 | 8 | 2 | 6 | A | 12179.8988 | 1.9  |
| 165 | 8  | 3 | 5 | 8 | 2 | 6 | E | 12179.8775 | 1.6  |
| 166 | 4  | 3 | 2 | 4 | 2 | 3 | A | 13209.8354 | 0.4  |
| 167 | 4  | 3 | 2 | 4 | 2 | 3 | E | 13209.7486 | 0.7  |
| 168 | 5  | 3 | 3 | 5 | 2 | 4 | A | 13254.9473 | -3.3 |
| 169 | 5  | 3 | 3 | 5 | 2 | 4 | E | 13254.9167 | 4.4  |
| 170 | 6  | 3 | 4 | 6 | 2 | 5 | A | 13332.3161 | -1.2 |
| 171 | 6  | 3 | 4 | 6 | 2 | 5 | E | 13332.2930 | 2.5  |
| 172 | 7  | 3 | 5 | 7 | 2 | 6 | A | 13452.4578 | 2.4  |
| 173 | 7  | 3 | 5 | 7 | 2 | 6 | E | 13452.4332 | 1.1  |
| 174 | 8  | 3 | 6 | 8 | 2 | 7 | A | 13626.0119 | -0.8 |
| 175 | 8  | 3 | 6 | 8 | 2 | 7 | E | 13625.9924 | 1.6  |
| 176 | 9  | 3 | 7 | 9 | 2 | 8 | A | 13863.2060 | -0.6 |
| 177 | 9  | 3 | 7 | 9 | 2 | 8 | E | 13863.1852 | -0.2 |
| 178 | 4  | 3 | 1 | 4 | 2 | 2 | A | 13086.4264 | -1.1 |
| 179 | 4  | 3 | 1 | 4 | 2 | 2 | E | 13086.4740 | 2.3  |
| 180 | 6  | 3 | 3 | 5 | 2 | 4 | A | 22808.3610 | 4.4  |
| 181 | 6  | 3 | 3 | 5 | 2 | 4 | E | 22808.3413 | 0.2  |
| 182 | 5  | 3 | 2 | 4 | 3 | 1 | A | 7942.1169  | 1.4  |
| 183 | 5  | 3 | 2 | 4 | 3 | 1 | E | 7942.0647  | -1.7 |

---

|            |   |   |   |   |   |   |   |            |      |
|------------|---|---|---|---|---|---|---|------------|------|
| <b>184</b> | 6 | 3 | 3 | 5 | 3 | 2 | A | 9546.1950  | 0.8  |
| <b>185</b> | 6 | 3 | 3 | 5 | 3 | 2 | E | 9546.1807  | -2.0 |
| <b>186</b> | 7 | 3 | 4 | 6 | 3 | 3 | A | 11161.1629 | -2.3 |
| <b>187</b> | 5 | 3 | 3 | 4 | 3 | 2 | A | 7936.7101  | -1.3 |
| <b>188</b> | 5 | 3 | 3 | 4 | 3 | 2 | E | 7936.7597  | -0.6 |
| <b>189</b> | 6 | 3 | 4 | 5 | 3 | 3 | A | 9531.8671  | -2.3 |
| <b>190</b> | 6 | 3 | 4 | 5 | 3 | 3 | E | 9531.8811  | 0.5  |
| <b>191</b> | 7 | 3 | 5 | 6 | 3 | 4 | A | 11129.2568 | 0.9  |
| <b>192</b> | 8 | 3 | 6 | 7 | 3 | 5 | A | 12727.7789 | -0.4 |
| <b>193</b> | 4 | 4 | 0 | 4 | 3 | 1 | A | 18438.2480 | 0.5  |
| <b>194</b> | 5 | 4 | 1 | 5 | 3 | 2 | A | 18425.2556 | -3.9 |
| <b>195</b> | 6 | 4 | 2 | 6 | 3 | 3 | A | 18400.3063 | 2.4  |
| <b>196</b> | 7 | 4 | 3 | 7 | 3 | 4 | A | 18356.0687 | -3.0 |
| <b>197</b> | 4 | 4 | 1 | 4 | 3 | 2 | A | 18440.0479 | -0.7 |
| <b>198</b> | 5 | 4 | 2 | 5 | 3 | 3 | A | 18432.4090 | -3.3 |
| <b>199</b> | 6 | 4 | 3 | 6 | 3 | 4 | A | 18421.5439 | -1.6 |
| <b>200</b> | 7 | 4 | 4 | 7 | 3 | 5 | A | 18408.4348 | -3.5 |
| <b>201</b> | 4 | 4 | 1 | 5 | 3 | 2 | A | 10496.1272 | 1.8  |

**Table S6:** Observed frequencies  $V_{obs}$  of 135 rotational transitions of *anti*-2PT, with  $V_{obs}-V_{calc}$  values obtained from a fit with the program *XIAM*.

| No.       | <i>J</i>    | <i>K<sub>a</sub></i> | <i>K<sub>c</sub></i> | <i>J</i>    | <i>K<sub>a</sub></i> | <i>K<sub>c</sub></i> | Species | <i>V<sub>obs</sub></i> | <i>V<sub>obs</sub>-V<sub>calc</sub></i> |
|-----------|-------------|----------------------|----------------------|-------------|----------------------|----------------------|---------|------------------------|-----------------------------------------|
|           | upper level |                      |                      | lower level |                      |                      |         | MHz                    | kHz                                     |
| <b>1</b>  | 2           | 0                    | 2                    | 1           | 0                    | 1                    | A       | 3233.0313              | -0.9                                    |
| <b>2</b>  | 3           | 0                    | 3                    | 2           | 0                    | 2                    | A       | 4822.4766              | -0.3                                    |
| <b>3</b>  | 4           | 0                    | 4                    | 3           | 0                    | 3                    | A       | 6380.7904              | -0.7                                    |
| <b>4</b>  | 5           | 0                    | 5                    | 4           | 0                    | 4                    | A       | 7901.5837              | 0.0                                     |
| <b>5</b>  | 6           | 0                    | 6                    | 5           | 0                    | 5                    | A       | 9384.0023              | 0.5                                     |
| <b>6</b>  | 7           | 0                    | 7                    | 6           | 0                    | 6                    | A       | 10833.7562             | 0.5                                     |
| <b>7</b>  | 8           | 0                    | 8                    | 7           | 0                    | 7                    | A       | 12261.1817             | 0.2                                     |
| <b>8</b>  | 9           | 0                    | 9                    | 8           | 0                    | 8                    | A       | 13677.2371             | 0.0                                     |
| <b>9</b>  | 10          | 0                    | 10                   | 9           | 0                    | 9                    | A       | 15090.2141             | 0.6                                     |
| <b>10</b> | 12          | 0                    | 12                   | 11          | 0                    | 11                   | A       | 17922.7399             | 0.3                                     |
| <b>11</b> | 13          | 0                    | 13                   | 12          | 0                    | 12                   | A       | 19344.2815             | 0.8                                     |
| <b>12</b> | 14          | 0                    | 14                   | 13          | 0                    | 13                   | A       | 20768.8765             | 0.1                                     |
| <b>13</b> | 15          | 0                    | 15                   | 14          | 0                    | 14                   | A       | 22195.8273             | 0.0                                     |
| <b>14</b> | 16          | 0                    | 16                   | 15          | 0                    | 15                   | A       | 23624.4912             | 1.1                                     |
| <b>15</b> | 3           | 0                    | 3                    | 2           | 1                    | 2                    | A       | 2632.7742              | -0.4                                    |
| <b>16</b> | 3           | 0                    | 3                    | 2           | 1                    | 2                    | E       | 2632.7765              | -0.6                                    |
| <b>17</b> | 4           | 0                    | 4                    | 3           | 1                    | 3                    | A       | 4438.5437              | 3.1                                     |
| <b>18</b> | 4           | 0                    | 4                    | 3           | 1                    | 3                    | E       | 4438.5395              | -3.5                                    |
| <b>19</b> | 5           | 0                    | 5                    | 4           | 1                    | 4                    | A       | 6251.9501              | -0.3                                    |
| <b>20</b> | 6           | 0                    | 6                    | 5           | 1                    | 5                    | A       | 8043.6780              | 0.2                                     |
| <b>21</b> | 7           | 0                    | 7                    | 6           | 1                    | 6                    | A       | 9791.0736              | -1.1                                    |
| <b>22</b> | 8           | 0                    | 8                    | 7           | 1                    | 7                    | A       | 11482.1107             | -0.3                                    |

---

|           |    |   |    |    |   |    |   |            |      |
|-----------|----|---|----|----|---|----|---|------------|------|
| <b>23</b> | 9  | 0 | 9  | 8  | 1 | 8  | A | 13115.3559 | -0.1 |
| <b>24</b> | 9  | 0 | 9  | 8  | 1 | 8  | E | 13115.3605 | 3.6  |
| <b>25</b> | 10 | 0 | 10 | 9  | 1 | 9  | A | 14696.7963 | -1.1 |
| <b>26</b> | 10 | 0 | 10 | 9  | 1 | 9  | E | 14696.7991 | 1.1  |
| <b>27</b> | 11 | 0 | 11 | 10 | 1 | 10 | A | 16235.8761 | 0.3  |
| <b>28</b> | 12 | 0 | 12 | 11 | 1 | 11 | A | 17742.4807 | 0.2  |
| <b>29</b> | 13 | 0 | 13 | 12 | 1 | 12 | A | 19225.3272 | 0.6  |
| <b>30</b> | 14 | 0 | 14 | 13 | 1 | 13 | A | 20691.3810 | 0.2  |
| <b>31</b> | 15 | 0 | 15 | 14 | 1 | 14 | A | 22145.8753 | -2.0 |
| <b>32</b> | 5  | 1 | 4  | 5  | 0 | 5  | A | 4172.0012  | 0.8  |
| <b>33</b> | 5  | 1 | 4  | 5  | 0 | 5  | E | 4171.9960  | -2.1 |
| <b>34</b> | 6  | 1 | 5  | 6  | 0 | 6  | A | 4989.6610  | 1.7  |
| <b>35</b> | 6  | 1 | 5  | 6  | 0 | 6  | E | 4989.6548  | -2.3 |
| <b>36</b> | 11 | 1 | 10 | 11 | 0 | 11 | A | 11653.7128 | -1.0 |
| <b>37</b> | 11 | 1 | 10 | 11 | 0 | 11 | E | 11653.7101 | -1.0 |
| <b>38</b> | 2  | 1 | 2  | 1  | 0 | 1  | A | 5422.7354  | 0.9  |
| <b>39</b> | 2  | 1 | 2  | 1  | 0 | 1  | E | 5422.7290  | -3.0 |
| <b>40</b> | 3  | 1 | 3  | 2  | 0 | 2  | A | 6764.7284  | 1.1  |
| <b>41</b> | 3  | 1 | 3  | 2  | 0 | 2  | E | 6764.7230  | -1.8 |
| <b>42</b> | 4  | 1 | 4  | 3  | 0 | 3  | A | 8030.4244  | 0.0  |
| <b>43</b> | 4  | 1 | 4  | 3  | 0 | 3  | E | 8030.4186  | -3.2 |
| <b>44</b> | 5  | 1 | 5  | 4  | 0 | 4  | A | 9241.9082  | 0.5  |
| <b>45</b> | 5  | 1 | 5  | 4  | 0 | 4  | E | 9241.9051  | -0.2 |
| <b>46</b> | 6  | 1 | 6  | 5  | 0 | 5  | A | 10426.6839 | 1.1  |
| <b>47</b> | 6  | 1 | 6  | 5  | 0 | 5  | E | 10426.6790 | -1.4 |
| <b>48</b> | 7  | 1 | 7  | 6  | 0 | 6  | A | 11612.8290 | 2.7  |
| <b>49</b> | 7  | 1 | 7  | 6  | 0 | 6  | E | 11612.8241 | 0.0  |
| <b>50</b> | 8  | 1 | 8  | 7  | 0 | 7  | A | 12823.0596 | -3.0 |
| <b>51</b> | 9  | 1 | 9  | 8  | 0 | 8  | A | 14070.6551 | 1.9  |
| <b>52</b> | 9  | 1 | 9  | 8  | 0 | 8  | E | 14070.6431 | -8.5 |
| <b>53</b> | 10 | 1 | 10 | 9  | 0 | 9  | A | 15359.1143 | 0.0  |
| <b>54</b> | 11 | 1 | 11 | 10 | 0 | 10 | A | 16685.0363 | 0.7  |
| <b>55</b> | 11 | 1 | 11 | 10 | 0 | 10 | E | 16685.0289 | -5.6 |
| <b>56</b> | 13 | 1 | 13 | 12 | 0 | 12 | A | 19421.7763 | -0.1 |
| <b>57</b> | 14 | 1 | 14 | 13 | 0 | 13 | A | 20818.8259 | -0.5 |
| <b>58</b> | 15 | 1 | 15 | 14 | 0 | 14 | A | 22227.7322 | -1.5 |
| <b>59</b> | 16 | 1 | 16 | 15 | 0 | 15 | A | 23644.7147 | 0.4  |
| <b>60</b> | 2  | 1 | 1  | 1  | 1 | 0  | A | 3433.4649  | -2.0 |
| <b>61</b> | 2  | 1 | 1  | 1  | 1 | 0  | E | 3433.4680  | 1.1  |
| <b>62</b> | 3  | 1 | 2  | 2  | 1 | 1  | A | 5143.1642  | 1.1  |
| <b>63</b> | 3  | 1 | 2  | 2  | 1 | 1  | E | 5143.1586  | -4.5 |
| <b>64</b> | 4  | 1 | 3  | 3  | 1 | 2  | A | 6843.8542  | -0.6 |
| <b>65</b> | 5  | 1 | 4  | 4  | 1 | 3  | A | 8531.5979  | -0.7 |
| <b>66</b> | 6  | 1 | 5  | 5  | 1 | 4  | A | 10201.6615 | 0.9  |
| <b>67</b> | 7  | 1 | 6  | 6  | 1 | 5  | A | 11848.4320 | 0.1  |
| <b>68</b> | 8  | 1 | 7  | 7  | 1 | 6  | A | 13465.5925 | 0.9  |
| <b>69</b> | 9  | 1 | 8  | 8  | 1 | 7  | A | 15046.7483 | 0.9  |

---

---

|            |    |   |    |    |   |    |   |            |      |
|------------|----|---|----|----|---|----|---|------------|------|
| <b>70</b>  | 11 | 1 | 10 | 10 | 1 | 9  | A | 18083.6850 | 1.1  |
| <b>71</b>  | 12 | 1 | 11 | 11 | 1 | 10 | A | 19540.4734 | 1.1  |
| <b>72</b>  | 2  | 1 | 2  | 1  | 1 | 1  | A | 3054.4417  | -3.1 |
| <b>73</b>  | 2  | 1 | 2  | 1  | 1 | 1  | E | 3054.4448  | -0.1 |
| <b>74</b>  | 3  | 1 | 3  | 2  | 1 | 2  | A | 4575.0247  | -0.4 |
| <b>75</b>  | 4  | 1 | 4  | 3  | 1 | 3  | A | 6088.1737  | -0.2 |
| <b>76</b>  | 5  | 1 | 5  | 4  | 1 | 4  | A | 7592.2751  | 0.7  |
| <b>77</b>  | 6  | 1 | 6  | 5  | 1 | 5  | A | 9086.3594  | 0.7  |
| <b>78</b>  | 7  | 1 | 7  | 6  | 1 | 6  | A | 10570.1456 | 0.3  |
| <b>79</b>  | 8  | 1 | 8  | 7  | 1 | 7  | A | 12043.9926 | 0.6  |
| <b>80</b>  | 9  | 1 | 9  | 8  | 1 | 8  | A | 13508.7730 | 0.9  |
| <b>81</b>  | 10 | 1 | 10 | 9  | 1 | 9  | A | 14965.6979 | -0.3 |
| <b>82</b>  | 11 | 1 | 11 | 10 | 1 | 10 | A | 16416.1349 | 0.0  |
| <b>83</b>  | 13 | 1 | 13 | 12 | 1 | 12 | A | 19302.8228 | 0.6  |
| <b>84</b>  | 14 | 1 | 14 | 13 | 1 | 13 | A | 20741.3308 | 0.1  |
| <b>85</b>  | 2  | 2 | 0  | 1  | 1 | 1  | A | 10738.7473 | -1.0 |
| <b>86</b>  | 2  | 2 | 0  | 1  | 1 | 1  | E | 10738.7402 | -2.3 |
| <b>87</b>  | 3  | 2 | 1  | 2  | 1 | 2  | A | 12593.6948 | 4.2  |
| <b>88</b>  | 3  | 2 | 1  | 2  | 1 | 2  | E | 12593.6757 | -7.7 |
| <b>89</b>  | 4  | 2 | 2  | 3  | 1 | 3  | A | 14605.1746 | 2.0  |
| <b>90</b>  | 4  | 2 | 2  | 3  | 1 | 3  | E | 14605.1721 | 6.9  |
| <b>91</b>  | 5  | 2 | 3  | 4  | 1 | 4  | A | 16810.8115 | 1.3  |
| <b>92</b>  | 7  | 2 | 5  | 6  | 1 | 6  | A | 21950.3955 | -1.1 |
| <b>93</b>  | 3  | 2 | 1  | 3  | 1 | 2  | A | 6881.9978  | 3.6  |
| <b>94</b>  | 3  | 2 | 1  | 3  | 1 | 2  | E | 6881.9837  | -3.3 |
| <b>95</b>  | 4  | 2 | 2  | 4  | 1 | 3  | A | 6624.6432  | -3.3 |
| <b>96</b>  | 5  | 2 | 3  | 5  | 1 | 4  | A | 6386.8651  | 5.7  |
| <b>97</b>  | 5  | 2 | 3  | 5  | 1 | 4  | E | 6386.8521  | -0.1 |
| <b>98</b>  | 2  | 2 | 1  | 1  | 1 | 0  | A | 10538.3083 | -5.0 |
| <b>99</b>  | 3  | 2 | 2  | 2  | 1 | 1  | A | 11970.7775 | -0.3 |
| <b>100</b> | 3  | 2 | 2  | 2  | 1 | 1  | E | 11970.7733 | 3.5  |
| <b>101</b> | 4  | 2 | 3  | 3  | 1 | 2  | A | 13307.0155 | -1.9 |
| <b>102</b> | 4  | 2 | 3  | 3  | 1 | 2  | E | 13307.0101 | 0.5  |
| <b>103</b> | 5  | 2 | 4  | 4  | 1 | 3  | A | 14548.7730 | 0.1  |
| <b>104</b> | 5  | 2 | 4  | 4  | 1 | 3  | E | 14548.7617 | -3.5 |
| <b>105</b> | 6  | 2 | 5  | 5  | 1 | 4  | A | 15699.9803 | 0.1  |
| <b>106</b> | 6  | 2 | 5  | 5  | 1 | 4  | E | 15699.9710 | -1.6 |
| <b>107</b> | 7  | 2 | 6  | 6  | 1 | 5  | A | 16767.6598 | 2.0  |
| <b>108</b> | 7  | 2 | 6  | 6  | 1 | 5  | E | 16767.6477 | -2.5 |
| <b>109</b> | 8  | 2 | 7  | 7  | 1 | 6  | A | 17762.9468 | 3.4  |
| <b>110</b> | 2  | 2 | 1  | 2  | 1 | 2  | A | 7673.3808  | 1.2  |
| <b>111</b> | 2  | 2 | 1  | 2  | 1 | 2  | E | 7673.3732  | 3.0  |
| <b>112</b> | 3  | 2 | 2  | 3  | 1 | 3  | A | 7964.2862  | 0.2  |
| <b>113</b> | 4  | 2 | 3  | 4  | 1 | 4  | A | 8355.5172  | 2.3  |
| <b>114</b> | 5  | 2 | 4  | 5  | 1 | 5  | A | 8848.8538  | 3.1  |
| <b>115</b> | 6  | 2 | 5  | 6  | 1 | 6  | A | 9445.3031  | 5.2  |
| <b>116</b> | 6  | 2 | 5  | 6  | 1 | 6  | E | 9445.2860  | -4.3 |

---

|     |   |   |   |   |   |   |   |            |      |
|-----|---|---|---|---|---|---|---|------------|------|
| 117 | 8 | 2 | 7 | 8 | 1 | 8 | A | 10944.2207 | 4.4  |
| 118 | 8 | 2 | 7 | 8 | 1 | 8 | E | 10944.2015 | -7.2 |
| 119 | 4 | 2 | 2 | 3 | 2 | 1 | A | 6586.5063  | -0.7 |
| 120 | 5 | 2 | 3 | 4 | 2 | 2 | A | 8293.8110  | -0.5 |
| 121 | 6 | 2 | 4 | 5 | 2 | 3 | A | 10030.2289 | -0.1 |
| 122 | 7 | 2 | 5 | 6 | 2 | 4 | A | 11787.9939 | 3.3  |
| 123 | 8 | 2 | 6 | 7 | 2 | 5 | A | 13554.4712 | 1.2  |
| 124 | 4 | 2 | 3 | 3 | 2 | 2 | A | 6479.4045  | 1.8  |
| 125 | 5 | 2 | 4 | 4 | 2 | 3 | A | 8085.6106  | 0.3  |
| 126 | 6 | 2 | 5 | 5 | 2 | 4 | A | 9682.8069  | 1.0  |
| 127 | 7 | 2 | 6 | 6 | 2 | 5 | A | 11269.3384 | 0.3  |
| 128 | 8 | 2 | 7 | 7 | 2 | 6 | A | 12843.7204 | 2.8  |
| 129 | 4 | 3 | 2 | 4 | 2 | 3 | A | 12350.9653 | -1.6 |
| 130 | 5 | 3 | 2 | 4 | 3 | 1 | A | 8151.6731  | -1.4 |
| 131 | 6 | 3 | 3 | 5 | 3 | 2 | A | 9803.2117  | 4.8  |
| 132 | 8 | 3 | 5 | 7 | 3 | 4 | A | 13156.3934 | -1.0 |
| 133 | 5 | 3 | 3 | 4 | 3 | 2 | A | 8143.4489  | -0.2 |
| 134 | 5 | 3 | 3 | 4 | 3 | 2 | E | 8143.4539  | -7.0 |
| 135 | 6 | 3 | 4 | 5 | 3 | 3 | A | 9781.4585  | 3.0  |

**Table S7:** Molecular parameters of *syn*-2PT and *anti*-2PT obtained with the program *XIAM* where the angles between the internal rotor axis and the principal axes of inertia are fixed to values predicted at the B3LYP-D3BJ/6-311++G(d,p) level of theory.

| Par. <sup>a</sup> | Unit             | <i>syn</i>        | <i>Calc.</i> <sup>b</sup> | <i>anti</i>       | <i>Calc.</i> <sup>b</sup> |
|-------------------|------------------|-------------------|---------------------------|-------------------|---------------------------|
| $A_0$             | MHz              | 3427.43880(19)    | 3383.114                  | 3274.03476(39)    | 3222.920                  |
| $B_0$             | MHz              | 877.177067(48)    | 866.872                   | 905.747027(78)    | 895.759                   |
| $C_0$             | MHz              | 704.893296(31)    | 696.450                   | 716231414 (37)    | 707.766                   |
| $D_J$             | kHz              | 0.01812(15)       | 0.0175                    | 0.02330(31)       | 0.0228                    |
| $D_{JK}$          | kHz              | 0.0749(27)        | 0.0820                    | 0.0621(69)        | 0.0419                    |
| $D_K$             | kHz              | 0.4474(93)        | 0.4541                    | 1.842(58)         | 0.4957                    |
| $d_1$             | kHz              | -0.00370(10)      | -0.0039                   | -0.00639(30)      | -0.0056                   |
| $d_2$             | kHz              | -0.000275(69)     | -0.0004                   | -0.00138(25)      | -0.0004                   |
| $V_3$             | cm <sup>-1</sup> | 807.00(54)        | 764.5                     | 865.4(88)         | 753.0                     |
| $\angle(i,a)$     | deg              | 19.9 <sup>c</sup> | 19.9                      | 9.9 <sup>c</sup>  | 9.9                       |
| $\angle(i,b)$     | deg              | 70.2 <sup>c</sup> | 70.2                      | 80.1 <sup>c</sup> | 80.1                      |
| $\angle(i,c)$     | deg              | 90.0 <sup>c</sup> | 90.0                      | 90.0 <sup>c</sup> | 90.0                      |
| $N_A/N_E^d$       | -                | 150/51            |                           | 103/32            |                           |
| $\sigma^e$        | kHz              | 2.6               |                           | 2.5               |                           |

<sup>a</sup> All parameters refer to the principal axis system. Watson's S reduction and I' representation were used. <sup>b</sup> Ground state rotational constants and centrifugal distortion constants from anharmonic frequency calculations, all other parameters from optimisations at the B3LYP-D3BJ/6-311++G(d,p) level of theory. <sup>c</sup> Fixed to the values calculated at the B3LYP-D3BJ/6-311++G(d,p) level predicting a planar geometry. <sup>d</sup> Number of A and E species transitions. <sup>e</sup> Standard deviation of the fit.

**Table S8a:** Observed frequencies  $\nu_{obs}$  of 23 rotational transitions of the  $^{34}\text{S}$  isotopologue of *syn*-2PT with  $\nu_{obs}-\nu_{calc}$  values obtained from a fit with the program *XIAM*.

| No. | <i>J</i>    | <i>K<sub>a</sub></i> | <i>K<sub>c</sub></i> | <i>J</i>    | <i>K<sub>a</sub></i> | <i>K<sub>c</sub></i> | $\nu_{obs}$ | $\nu_{obs}-\nu_{calc}$ |
|-----|-------------|----------------------|----------------------|-------------|----------------------|----------------------|-------------|------------------------|
|     | upper level |                      |                      | lower level |                      |                      | MHz         | kHz                    |
| 1   | 2           | 0                    | 2                    | 1           | 0                    | 1                    | 3130.6784   | -0.1                   |
| 2   | 3           | 0                    | 3                    | 2           | 0                    | 2                    | 4674.7172   | -1.0                   |
| 3   | 4           | 0                    | 4                    | 3           | 0                    | 3                    | 6194.0013   | -0.3                   |
| 4   | 5           | 0                    | 5                    | 4           | 0                    | 4                    | 7682.6943   | 0.5                    |
| 5   | 6           | 0                    | 6                    | 5           | 0                    | 5                    | 9138.5519   | 1.6                    |
| 6   | 2           | 1                    | 2                    | 1           | 0                    | 1                    | 5472.7622   | -3.2                   |
| 7   | 5           | 1                    | 5                    | 4           | 0                    | 4                    | 9219.1284   | -1.8                   |
| 8   | 6           | 1                    | 6                    | 5           | 0                    | 5                    | 10376.0502  | -0.8                   |
| 9   | 7           | 1                    | 7                    | 6           | 0                    | 6                    | 11525.3196  | -0.2                   |
| 10  | 3           | 1                    | 3                    | 2           | 1                    | 2                    | 4445.3162   | -0.2                   |
| 11  | 4           | 1                    | 4                    | 3           | 1                    | 3                    | 5917.6849   | -1.1                   |
| 12  | 5           | 1                    | 5                    | 4           | 1                    | 4                    | 7382.7606   | -0.2                   |
| 13  | 3           | 1                    | 2                    | 2           | 1                    | 1                    | 4961.7111   | 1.0                    |
| 14  | 4           | 1                    | 3                    | 3           | 1                    | 2                    | 6604.9657   | 0.2                    |
| 15  | 5           | 1                    | 4                    | 4           | 1                    | 3                    | 8238.2752   | 0.1                    |
| 16  | 2           | 2                    | 0                    | 1           | 1                    | 1                    | 11009.4573  | -3.3                   |
| 17  | 3           | 2                    | 1                    | 2           | 1                    | 2                    | 12785.4664  | -0.5                   |
| 18  | 4           | 2                    | 2                    | 3           | 1                    | 3                    | 14696.4655  | -7.9                   |
| 19  | 4           | 2                    | 3                    | 3           | 1                    | 2                    | 13536.1898  | 4.1                    |
| 20  | 3           | 2                    | 1                    | 3           | 1                    | 2                    | 7307.0851   | -10.1                  |
| 21  | 6           | 2                    | 5                    | 5           | 2                    | 4                    | 9379.2202   | 0.7                    |
| 22  | 3           | 3                    | 0                    | 2           | 2                    | 1                    | 17673.5653  | 6.1                    |
| 23  | 3           | 3                    | 1                    | 2           | 2                    | 0                    | 17664.7218  | 5.5                    |

**Table S8b:** Observed frequencies  $\nu_{obs}$  of 15 rotational transitions of the  $^{13}\text{C}(6)$  isotopologue (for atom numbering see Figure 1) of *syn*-2PT with  $\nu_{obs}-\nu_{calc}$  values obtained from a fit with the program XIAM.

| No. | $J$         | $K_a$ | $K_c$ | $J$         | $K_a$ | $K_c$ | $\nu_{obs}$<br>MHz | $\nu_{obs}-\nu_{calc}$<br>kHz |
|-----|-------------|-------|-------|-------------|-------|-------|--------------------|-------------------------------|
|     | upper level |       |       | lower level |       |       |                    |                               |
| 1   | 2           | 0     | 2     | 1           | 0     | 1     | 3148.8581          | -0.6                          |
| 2   | 3           | 0     | 3     | 2           | 0     | 2     | 4702.4997          | 0.9                           |
| 3   | 4           | 0     | 4     | 3           | 0     | 3     | 6231.9455          | 1.1                           |
| 4   | 5           | 0     | 5     | 4           | 0     | 4     | 7731.4034          | 1.0                           |
| 5   | 2           | 1     | 2     | 1           | 0     | 1     | 5536.8014          | 0.1                           |
| 6   | 3           | 1     | 3     | 2           | 0     | 2     | 6861.2767          | -4.0                          |
| 7   | 4           | 1     | 4     | 3           | 0     | 3     | 8114.0453          | -1.3                          |
| 8   | 5           | 1     | 5     | 4           | 0     | 4     | 9312.1487          | -1.9                          |
| 9   | 3           | 1     | 3     | 2           | 1     | 2     | 4473.3385          | 0.3                           |
| 10  | 5           | 1     | 5     | 4           | 1     | 4     | 7430.0502          | 1.9                           |
| 11  | 2           | 2     | 0     | 1           | 1     | 1     | 11162.2901         | 3.0                           |
| 12  | 3           | 2     | 1     | 2           | 1     | 2     | 12945.8286         | -4.3                          |
| 13  | 4           | 2     | 2     | 3           | 1     | 3     | 14862.9280         | -1.0                          |
| 14  | 3           | 2     | 2     | 2           | 1     | 1     | 12389.3421         | 2.0                           |
| 15  | 4           | 2     | 3     | 3           | 1     | 2     | 13709.4111         | 2.5                           |

**Table S8c:** Observed frequencies  $\nu_{obs}$  of 14 rotational transitions of the  $^{13}\text{C}(8)$  isotopologue (for atom numbering see Figure 1) of *syn*-2PT, with  $\nu_{obs}-\nu_{calc}$  obtained from a fit with the program XIAM.

| No. | $J$         | $K_a$ | $K_c$ | $J$         | $K_a$ | $K_c$ | $\nu_{obs}$<br>MHz | $\nu_{obs}-\nu_{calc}$<br>kHz |
|-----|-------------|-------|-------|-------------|-------|-------|--------------------|-------------------------------|
|     | upper level |       |       | lower level |       |       |                    |                               |
| 1   | 3           | 0     | 3     | 2           | 0     | 2     | 4674.5215          | 0.2                           |
| 2   | 4           | 0     | 4     | 3           | 0     | 3     | 6194.9983          | -0.9                          |
| 3   | 5           | 0     | 5     | 4           | 0     | 4     | 7685.7609          | 1.6                           |
| 4   | 2           | 1     | 2     | 1           | 0     | 1     | 5508.1655          | -3.6                          |
| 5   | 3           | 1     | 3     | 2           | 0     | 2     | 6824.9792          | -0.4                          |
| 6   | 4           | 1     | 4     | 3           | 0     | 3     | 8070.5414          | 2.3                           |
| 7   | 5           | 1     | 5     | 4           | 0     | 4     | 9261.7360          | -2.2                          |
| 8   | 3           | 1     | 3     | 2           | 1     | 2     | 4446.8861          | 0.4                           |
| 9   | 5           | 1     | 5     | 4           | 1     | 4     | 7386.1996          | 1.2                           |
| 10  | 5           | 1     | 4     | 4           | 1     | 3     | 8232.9167          | 0.8                           |
| 11  | 2           | 2     | 0     | 1           | 1     | 1     | 11108.0603         | 2.8                           |
| 12  | 3           | 2     | 1     | 2           | 1     | 2     | 12880.6632         | 5.2                           |
| 13  | 4           | 2     | 2     | 3           | 1     | 3     | 14785.7556         | -5.1                          |
| 14  | 4           | 2     | 3     | 3           | 1     | 2     | 13640.5904         | -1.7                          |



**Table S8d:** Observed frequencies  $\nu_{obs}$  of 12 rotational transitions of the  $^{13}\text{C}(9)$  isotopologue (for atom numbering see Figure 1) of *syn*-2PT, with  $\nu_{obs}-\nu_{calc}$  obtained from a fit with the program *XIAM*.

| No. | <i>J</i>    | <i>K<sub>a</sub></i> | <i>K<sub>c</sub></i> | <i>J</i>    | <i>K<sub>a</sub></i> | <i>K<sub>c</sub></i> | $\nu_{obs}$<br>MHz | $\nu_{obs}-\nu_{calc}$<br>kHz |
|-----|-------------|----------------------|----------------------|-------------|----------------------|----------------------|--------------------|-------------------------------|
|     | upper level |                      |                      | lower level |                      |                      |                    |                               |
| 1   | 2           | 0                    | 2                    | 1           | 0                    | 1                    | 3091.1949          | 0.5                           |
| 2   | 3           | 0                    | 3                    | 2           | 0                    | 2                    | 4617.5420          | -1.3                          |
| 3   | 4           | 0                    | 4                    | 3           | 0                    | 3                    | 6121.4372          | -0.3                          |
| 4   | 2           | 1                    | 2                    | 1           | 0                    | 1                    | 5500.6074          | -2.6                          |
| 5   | 4           | 1                    | 4                    | 3           | 0                    | 3                    | 8039.4466          | -0.7                          |
| 6   | 5           | 1                    | 5                    | 4           | 0                    | 4                    | 9220.0956          | 0.3                           |
| 7   | 5           | 1                    | 5                    | 4           | 1                    | 4                    | 7302.0868          | 1.3                           |
| 8   | 2           | 2                    | 0                    | 1           | 1                    | 1                    | 11139.0376         | -1.7                          |
| 9   | 3           | 2                    | 1                    | 2           | 1                    | 2                    | 12884.8388         | 0.7                           |
| 10  | 4           | 2                    | 2                    | 3           | 1                    | 3                    | 14757.6418         | -0.1                          |
| 11  | 3           | 2                    | 2                    | 2           | 1                    | 1                    | 12349.8256         | 2.6                           |
| 12  | 4           | 2                    | 3                    | 3           | 1                    | 2                    | 13650.0156         | -0.4                          |

**Table S8e:** Observed frequencies  $\nu_{obs}$  of 4 rotational transitions of the  $^{34}\text{S}$  isotopologue of *anti*-2PT, with  $\nu_{obs}-\nu_{calc}$  obtained from a tentative fit with the program *XIAM*.

| No. | <i>J</i>    | <i>K<sub>a</sub></i> | <i>K<sub>c</sub></i> | <i>J</i>    | <i>K<sub>a</sub></i> | <i>K<sub>c</sub></i> | $\nu_{obs}$<br>MHz | $\nu_{obs}-\nu_{calc}$<br>kHz |
|-----|-------------|----------------------|----------------------|-------------|----------------------|----------------------|--------------------|-------------------------------|
|     | upper level |                      |                      | lower level |                      |                      |                    |                               |
| 1   | 2           | 2                    | 0                    | 1           | 1                    | 1                    | 10558.2584         | -0.2                          |
| 2   | 5           | 1                    | 5                    | 4           | 0                    | 4                    | 9134.7002          | 2.1                           |
| 3   | 6           | 0                    | 6                    | 5           | 0                    | 5                    | 9318.5508          | 0.0                           |
| 4   | 6           | 1                    | 6                    | 5           | 0                    | 5                    | 10310.7978         | -1.7                          |
